# Supplementary material for: Low-Protein Formulas with Alpha-Lactalbumin-Enriched or Glycomacropeptide-Reduced Whey: Effects on Growth, Nutrient Intake and Protein Metabolism during Early Infancy: A Randomized, Double-Blinded Controlled Trial
Source: MDPI journal article supplement (doi:10.3390/nu15041010), 2023-02-17
Supplement: s1 [file s1]

## Supplementary Material

### Low-Protein Formulas with Alpha-lactalbumin-enriched or Glycomacropeptide-reduced Whey: Effects on Growth, Nutrient Intake and Protein Metabolism during Early Infancy: A Randomized, Double-Blinded Controlled Trial

Ulrika Tinghäll Nilsson , Olle Hernell , Bo Lönnerdal , Merete Lindberg Hartvigsen , Lotte Neergaard Jacobsen , Anne Staudt Kvistgaard and Pia Karlsland Åkeson

**Table S1.** Nutrient content in study formulas and minimum levels according to regulation.

|                                   | SF <sup>2</sup> | $\alpha$ -lac-EW | CGMP-RW | Regulation <sup>3</sup> |
|-----------------------------------|-----------------|------------------|---------|-------------------------|
| Energy (kcal/100 ml) <sup>1</sup> | 67.3            | 68.2             | 68.0    | 60                      |
| Whey: casein ratio                | 60:40           | 70:30            | 70:30   |                         |
| Protein (g/100ml)                 | 1.48            | 1.19             | 1.20    |                         |
| Protein (g/ 100 kcal)             | 2.20            | 1.75             | 1.76    | 1.8                     |
| $\alpha$ -lactalbumin (%)         | 10              | 27               | 14      |                         |
| Carbohydrate (g)                  | 10.1            | 10.1             | 10.2    | 9                       |
| Fat (g)                           | 5.6             | 5.7              | 5.7     | 4.4                     |
| Calcium (mg)                      | 102.0           | 100.0            | 98.0    | 50                      |
| Phosphorous (mg)                  | 57.1            | 63.6             | 64.1    | 25                      |
| Magnesium (mg)                    | 10.0            | 10.0             | 10.0    | 5                       |
| Iron (mg)                         | 1.2             | 1.2              | 1.1     | 0.3                     |
| Zinc (mg)                         | 1.2             | 1.2              | 1.2     | 0.5                     |
| Manganese ( $\mu$ g)              | 54.6            | 53.6             | 53.1    | 1                       |
| Copper ( $\mu$ g)                 | 67.1            | 69.0             | 59.7    | 35                      |
| Iodine ( $\mu$ g)                 | 35.9            | 32.9             | 34.0    | 10                      |
| Sodium (mg)                       | 27.0            | 27.0             | 29.0    | 20                      |
| Potassium (mg)                    | 96.8            | 91.9             | 91.0    | 60                      |
| Chloride (mg)                     | 70.4            | 71.0             | 69.0    | 50                      |
| Selenium ( $\mu$ g)               | 5.5             | 5.0              | 5.1     | 1                       |
| Vitamin A ( $\mu$ g ER)           | 163.2           | 171.0            | 166.7   | 60                      |
| Vitamin D3 ( $\mu$ g)             | 2.2             | 2.3              | 2.3     | 1                       |
| Vitamin E (mg $\alpha$ TE)        | 4.2             | 4.2              | 4.4     | 0.5                     |
| Vitamin K ( $\mu$ g)              | 19.4            | 20.6             | 20.8    | 4                       |
| Thiamine (B1) ( $\mu$ g)          | 257.9           | 253.5            | 252.2   | 60                      |
| Riboflavin (B2) ( $\mu$ g)        | 345.1           | 314.9            | 324.2   | 80                      |
| Niacin (B3) ( $\mu$ g)            | 1257.8          | 1270.0           | 1299.0  | 300                     |
| Pantothenic acid (B5) ( $\mu$ g)  | 1338.3          | 1256.0           | 1298.0  | 400                     |
| Pyridoxin (B6) ( $\mu$ g)         | 153.4           | 157.0            | 153.6   | 35                      |
| Biotin (B8) ( $\mu$ g)            | 6.3             | 5.9              | 6.0     | 1.5                     |
| Folic acid (B9) ( $\mu$ g)        | 44.9            | 41.6             | 42.0    | 10                      |
| Cobalamin (B12) ( $\mu$ g)        | 0.45            | 0.31             | 0.37    | 0.1                     |
| Vitamin C (mg)                    | 23.0            | 23.8             | 23.5    | 10                      |

<sup>1</sup>Energy in kcal/100 ml, protein content in g/100 ml and g/100 kcal, all other nutrients in /100 kcal. <sup>2</sup>SF, standard formula;  $\alpha$ -lac-EW, experimental formula with  $\alpha$ -lactalbumin-enriched whey; CGMP-RW, experimental formula with reduced CGMP whey. <sup>3</sup>EU Regulation [7].

**Table S2.** Amino acid content in study formulas and minimum levels according to regulation.

|                            | SF <sup>1</sup> | $\alpha$ -lac-EW | CGMP-RW | Regulation <sup>2</sup> |
|----------------------------|-----------------|------------------|---------|-------------------------|
| Essential (mg/100 kcal)    |                 |                  |         |                         |
| Cysteine                   | 37              | 39               | 39      | 38                      |
| Histidine                  | 56              | 42               | 45      | 40                      |
| Isoleucine                 | 127             | 111              | 96      | 90                      |
| Leucine                    | 225             | 160              | 201     | 166                     |
| Lysine                     | 208             | 162              | 177     | 113                     |
| Methionine                 | 53              | 36               | 42      | 23                      |
| Phenylalanine              | 89              | 65               | 72      | 83                      |
| Threonine                  | 127             | 117              | 87      | 77                      |
| Tryptophan                 | 37              | 36               | 35      | 32                      |
| Tyrosine                   | 82              | 56               | 66      | 76                      |
| Valine                     | 135             | 103              | 98      | 88                      |
| Nonessential (mg/100 kcal) |                 |                  |         |                         |
| Alanine                    | 93              | 60               | 77      | -                       |
| Arginine                   | 65              | 45               | 51      | -                       |
| Aspartic acids             | 211             | 186              | 182     | -                       |
| Glutamic acid              | 439             | 314              | 344     | -                       |
| Glycine                    | 44              | 36               | 36      | -                       |
| Proline                    | 177             | 118              | 115     | -                       |
| Serine                     | 114             | 90               | 85      | -                       |

<sup>1</sup>SF, standard formula;  $\alpha$ -lac-EW, experimental formula with  $\alpha$ -lactalbumin-enriched whey; CGMP-RW, experimental formula with reduced CGMP whey.

<sup>2</sup>EU Regulation [7].

**Table S3 a.** Mean serum concentration of essential and nonessential amino acids at 2 months of age in a randomized subgroup of infants fed formula (SF,  $\alpha$ -lac-EW or CGMP-RW)\* or breast milk (BF).

|                                         | SF<br><i>n</i> =50                        | $\alpha$ -lac-EW<br><i>n</i> =50 | CGMP-RW<br><i>n</i> =50       | BF<br><i>n</i> =50 |
|-----------------------------------------|-------------------------------------------|----------------------------------|-------------------------------|--------------------|
| 2 mo                                    |                                           |                                  |                               |                    |
| Essential amino acids<br>( $\mu$ mol/L) |                                           |                                  |                               |                    |
| Histidine                               | 96.8 <sup>a</sup> $\pm$ 14.2 <sup>1</sup> | 103.3 <sup>a,d</sup> $\pm$ 21.1  | 93.6 $\pm$ 13.5               | 88.1 $\pm$ 11.7    |
| Isoleucine                              | 77.4 <sup>a</sup> $\pm$ 14.6              | 75.9 $\pm$ 16.2                  | 74.4 $\pm$ 17.9               | 68.0 $\pm$ 18.4    |
| Leucine                                 | 136.4 $\pm$ 22.8                          | 134.7 $\pm$ 25.7                 | 131.5 $\pm$ 29.2              | 125.7 $\pm$ 29.6   |
| Lysine                                  | 238.9 <sup>a</sup> $\pm$ 45.2             | 242.1 <sup>a</sup> $\pm$ 45.4    | 233.5 <sup>a</sup> $\pm$ 39.0 | 184.8 $\pm$ 46.6   |
| Methionine                              | 33.0 $\pm$ 6.2                            | 32.3 $\pm$ 7.8                   | 30.2 $\pm$ 6.3                | 25.2 $\pm$ 4.9     |
| Phenylalanine                           | 68.1 <sup>a</sup> $\pm$ 22.4              | 68.2 <sup>a</sup> $\pm$ 11.5     | 66.9 <sup>a</sup> $\pm$ 13.9  | 56.5 $\pm$ 11.1    |
| Threonine                               | 210.7 <sup>a</sup> $\pm$ 43.6             | 211.4 <sup>a</sup> $\pm$ 47.2    | 191.9 <sup>a</sup> $\pm$ 43.2 | 140.6 $\pm$ 26.3   |
| Tryptophan                              | 76.8 $\pm$ 9.7                            | 76.0 $\pm$ 12.1                  | 74.4 $\pm$ 11.1               | 79.3 $\pm$ 12.8    |
| Valine                                  | 196.9 <sup>a</sup> $\pm$ 34.4             | 196.2 <sup>a</sup> $\pm$ 41.1    | 192.2 <sup>a</sup> $\pm$ 39.8 | 170.8 $\pm$ 33.9   |
| BCAA**                                  | 410.1 <sup>a</sup> $\pm$ 65.8             | 406.8 <sup>a</sup> $\pm$ 77.5    | 398.0 $\pm$ 82.2              | 364.4 $\pm$ 78.1   |

|                          |                                |                                 |                                |                   |
|--------------------------|--------------------------------|---------------------------------|--------------------------------|-------------------|
| Nonessential amino acids |                                |                                 |                                |                   |
| ( $\mu\text{mol/L}$ )    |                                |                                 |                                |                   |
| Alanine                  | 423.1 $\pm$ 74.0               | 433.9 $\pm$ 102.72              | 404.5 $\pm$ 84.52              | 395.5 $\pm$ 71.33 |
| Arginine                 | 109.3 $\pm$ 21.0               | 108.8 $\pm$ 24.5                | 111.0 $\pm$ 15.2               | 114.8 $\pm$ 24.3  |
| Asparagine               | 59.3 <sup>a</sup> $\pm$ 10.9   | 59.3 <sup>a</sup> $\pm$ 15.7    | 56.30 <sup>a</sup> $\pm$ 12.76 | 48.98 $\pm$ 12.96 |
| Aspartic                 | 27.96 <sup>b</sup> $\pm$ 8.58  | 33.09 <sup>d</sup> $\pm$ 11.95  | 28.28 $\pm$ 6.73               | 29.30 $\pm$ 9.46  |
| Glutamic                 | 204.9 <sup>a</sup> $\pm$ 125.3 | 219.6 <sup>a</sup> $\pm$ 83.34  | 216.7 <sup>a</sup> $\pm$ 100.1 | 284.3 $\pm$ 159.3 |
| Glutamine                | 450.6 $\pm$ 158.5              | 436.1 $\pm$ 147.2               | 464.1 $\pm$ 158.9              | 417.0 $\pm$ 180.4 |
| Glycine                  | 269.9 <sup>b</sup> $\pm$ 46.9  | 305.9 <sup>a,d</sup> $\pm$ 66.7 | 255.6 $\pm$ 42.3               | 254.7 $\pm$ 42.8  |
| Proline                  | 210.7 <sup>a</sup> $\pm$ 37.6  | 211.5 <sup>a</sup> $\pm$ 38.8   | 204.7 <sup>a</sup> $\pm$ 36.0  | 246.3 $\pm$ 41.3  |
| Serine                   | 181.1 <sup>b</sup> $\pm$ 49.5  | 218.4 <sup>d</sup> $\pm$ 96.7   | 175.9 $\pm$ 39.4               | 192.1 $\pm$ 41.9  |
| Tyrosine                 | 101.7 $\pm$ 25.4               | 97.4 $\pm$ 25.2                 | 96.8 $\pm$ 23.7                | 93.0 $\pm$ 19.6   |

\*SF, standard formula;  $\alpha$ -lac-EW, experimental formula with  $\alpha$ -lactalbumin-enriched whey ; CGMP-RW, experimental formula with reduced CGMP whey.

<sup>1</sup>Mean  $\pm$  SD. Groups compared by one-way ANOVA, post hoc Bonferroni.

P value < 0.05 are considered statistically significant and marked by superscript letters. <sup>a</sup>Significantly different vs. BF. <sup>b</sup>SF vs.  $\alpha$ -lac-EW. <sup>c</sup>SF vs. CGMP-RW.

<sup>d</sup> $\alpha$ -lac-EW vs. CGMP-RW. \*\* Total mean of branched chain amino acids (BCAA), isoleucine, leucine and valine.

**Table S3 b.** Mean serum concentration of essential and nonessential amino acids at 4 months of age in a randomized subgroup of infants fed formula (SF,  $\alpha$ -lac-EW or CGMP-RW)\* or breastmilk (BF)

|                          | SF                                | $\alpha$ -lac-EW                | CGMP-RW                       | BF                |
|--------------------------|-----------------------------------|---------------------------------|-------------------------------|-------------------|
|                          | n=50                              | n=50                            | n=50                          | n=50              |
| 4 mo                     |                                   |                                 |                               |                   |
| Essential amino acids    |                                   |                                 |                               |                   |
| ( $\mu\text{mol/L}$ )    |                                   |                                 |                               |                   |
| Histidine                | 74.8 $\pm$ 11.9 <sup>1</sup>      | 72.3 $\pm$ 13.3                 | 69.3 <sup>a</sup> $\pm$ 9.6   | 78.5 $\pm$ 11.9   |
| Isoleucine               | 90.5 <sup>a,c</sup> $\pm$ 21.6    | 89.3 <sup>a,d</sup> $\pm$ 22.7  | 68.5 $\pm$ 10.6               | 59.8 $\pm$ 15.1   |
| Leucine                  | 137.2 <sup>a,b</sup> $\pm$ 31.0   | 106.7 <sup>d</sup> $\pm$ 25.3   | 123.4 <sup>a</sup> $\pm$ 31.4 | 98.7 $\pm$ 26.0   |
| Lysine                   | 213.5 <sup>a,b</sup> $\pm$ 36.6   | 194.0 <sup>a</sup> $\pm$ 36.0   | 198.8 <sup>a</sup> $\pm$ 38.3 | 144.6 $\pm$ 28.3  |
| Methionine               | 27.6 <sup>a,b</sup> $\pm$ 6.4     | 23.0 <sup>a</sup> $\pm$ 5.1     | 24.9 <sup>a</sup> $\pm$ 6.4   | 19.0 $\pm$ 4.0    |
| Phenylalanine            | 62.0 <sup>a</sup> $\pm$ 8.9       | 55.1 $\pm$ 10.7                 | 57.5 $\pm$ 10.2               | 52.0 $\pm$ 9.3    |
| Threonine                | 173.1 <sup>a,c</sup> $\pm$ 32.8   | 216.6 <sup>a,d</sup> $\pm$ 38.6 | 138.7 $\pm$ 31.1              | 126.1 $\pm$ 26.3  |
| Tryptophan               | 68.4 $\pm$ 10.8                   | 72.0 $\pm$ 11.9                 | 68.5 $\pm$ 10.6               | 69.6 $\pm$ 11.6   |
| Valine                   | 229.0 <sup>a,b,c</sup> $\pm$ 38.6 | 196.8 <sup>a,d</sup> $\pm$ 36.6 | 163.7 $\pm$ 32.4              | 149.4 $\pm$ 32.7  |
| BCAA**                   | 456.7 <sup>a,b,c</sup> $\pm$ 89.9 | 392.8 <sup>a</sup> $\pm$ 83.0   | 357.0 <sup>a</sup> $\pm$ 80.5 | 307.8 $\pm$ 72.3  |
| Nonessential amino acids |                                   |                                 |                               |                   |
| ( $\mu\text{mol/L}$ )    |                                   |                                 |                               |                   |
| Alanine                  | 367.9 $\pm$ 66.7                  | 408.3 <sup>a,b</sup> $\pm$ 78.1 | 396.6 $\pm$ 86.1              | 370.6 $\pm$ 71.8  |
| Arginine                 | 109.7 $\pm$ 18.0                  | 105.3 $\pm$ 16.4                | 108.7 $\pm$ 18.7              | 111.1 $\pm$ 16.2  |
| Asparagine               | 59.0 <sup>a</sup> $\pm$ 10.8      | 61.6 <sup>a,d</sup> $\pm$ 13.2  | 55.2 <sup>a</sup> $\pm$ 10.4  | 45.2 $\pm$ 8.8    |
| Aspartic                 | 26.4 $\pm$ 8.9                    | 26.9 $\pm$ 8.9                  | 26.0 $\pm$ 6.8                | 24.1 $\pm$ 7.1    |
| Glutamic                 | 167.2 $\pm$ 59.1                  | 174.8 $\pm$ 56.3                | 186.8 $\pm$ 75.7              | 207.8 $\pm$ 102.1 |
| Glutamine                | 442.0 <sup>a</sup> $\pm$ 120.0    | 494.7 $\pm$ 117.1               | 479.3 $\pm$ 136.9             | 536.5 $\pm$ 166.6 |
| Glycine                  | 212.6 $\pm$ 43.0                  | 243.1 <sup>b</sup> $\pm$ 43.6   | 225.6 $\pm$ 40.3              | 229.1 $\pm$ 48.4  |
| Proline                  | 199.1 <sup>a,c</sup> $\pm$ 35.1   | 185.1 <sup>a</sup> $\pm$ 34.4   | 174.2 <sup>a</sup> $\pm$ 27.9 | 218.9 $\pm$ 45.8  |

|          |                            |              |              |              |
|----------|----------------------------|--------------|--------------|--------------|
| Serine   | 174.9 ± 53.1               | 191.4 ± 56.6 | 178.7 ± 44.1 | 184.9 ± 34.5 |
| Tyrosine | 90.6 <sup>a,b</sup> ± 20.7 | 75.6 ± 18.6  | 83.3 ± 23.8  | 75.0 ± 16.5  |

<sup>a</sup>SF, standard formula;  $\alpha$ -lac-EW, experimental formula with  $\alpha$ -lactalbumin-enriched whey ; CGMP-RW, experimental formula with reduced CGMP whey.

<sup>1</sup> Mean  $\pm$  SD. Groups compared by one-way ANOVA, post hoc Bonferroni.

P value < 0.05 are considered statistically significant and marked by superscript letters. <sup>a</sup>Significantly different vs. BF. <sup>b</sup> SF vs.  $\alpha$ -lac-EW. <sup>c</sup> SF vs. CGMP-RW.

<sup>d</sup>  $\alpha$ -lac-EW vs. CGMP-RW. \*\* Total mean of branched chain amino acids (BCAA), isoleucine, leucine and valine.

**Table S3 c.** Mean serum concentration of essential and nonessential amino acids at 6 months of age in a randomized subgroup of infants fed formula (SF,  $\alpha$ -lac-EW or CGMP-RW)\* or breast milk (BF).

|                                            | SF<br><i>n</i> =50                    | $\alpha$ -lac-EW<br><i>n</i> =50 | CGMP-RW<br><i>n</i> =50    | BF<br><i>n</i> =50 |
|--------------------------------------------|---------------------------------------|----------------------------------|----------------------------|--------------------|
|                                            | 6 mo                                  |                                  |                            |                    |
| Essential amino acids<br>( $\mu$ mol/L)    |                                       |                                  |                            |                    |
| Histidine                                  | 71.3 <sup>a</sup> ± 13.4 <sup>1</sup> | 65.3 <sup>a</sup> ± 15.1         | 71.5 <sup>a</sup> ± 13.8   | 80.8 ± 13.2        |
| Isoleucine                                 | 90.9 <sup>a,c</sup> ± 21.2            | 85.3 <sup>a,d</sup> ± 20.3       | 73.8 <sup>a</sup> ± 18.9   | 58.4 ± 13.1        |
| Leucine                                    | 139.5 <sup>a,b</sup> ± 31.4           | 107.4 <sup>d</sup> ± 25.4        | 127.6 <sup>a</sup> ± 35.9  | 93.8 ± 21.6        |
| Lysine                                     | 199.2 <sup>a,b</sup> ± 39.8           | 173.4 <sup>a</sup> ± 43.0        | 188.4 <sup>a</sup> ± 37.5  | 140.2 ± 28.3       |
| Methionine                                 | 24.8 <sup>a,b</sup> ± 7.1             | 20.3 ± 5.6                       | 23.2 <sup>a</sup> ± 5.4    | 18.2 ± 3.8         |
| Phenylalanine                              | 63.3 <sup>a,b</sup> ± 9.5             | 58.6 ± 10.5                      | 60.0 ± 11.8                | 54.8 ± 12.5        |
| Threonine                                  | 153.8 <sup>a,b</sup> ± 34.4           | 181.9 <sup>a,d</sup> ± 49.0      | 139.2 ± 32.8               | 126.9 ± 25.8       |
| Tryptophan                                 | 68.2 ± 9.2                            | 68.3 ± 13.4                      | 70.1 <sup>a</sup> ± 12.5   | 63.3 ± 13.1        |
| Valine                                     | 235.8 <sup>a,b,c</sup> ± 39.3         | 197.6 <sup>a,d</sup> ± 39.4      | 177.9 <sup>a</sup> ± 41.1  | 157.0 ± 29.5       |
| BCAA**                                     | 466.2 <sup>a,b,c</sup> ± 90.4         | 388.3 <sup>a</sup> ± 81.0        | 379.3 <sup>a</sup> ± 90.1  | 309.2 ± 61.8       |
| Nonessential amino acids<br>( $\mu$ mol/L) |                                       |                                  |                            |                    |
| Alanine                                    | 353.2 ± 75.6                          | 373.6 ± 90.0                     | 400.4 <sup>c</sup> ± 111.2 | 361.6 ± 73.6       |
| Arginine                                   | 111.7 ± 18.9                          | 102.8 ± 25.9                     | 113.6 ± 22.7               | 112.1 ± 22.5       |
| Asparagine                                 | 58.3 <sup>a</sup> ± 12.2              | 56.7 <sup>a</sup> ± 16.0         | 57.2 <sup>a</sup> ± 13.4   | 45.0 ± 11.5        |
| Aspartic                                   | 27.0 ± 9.3                            | 25.1 ± 8.5                       | 27.3 ± 10.8                | 23.0 ± 6.5         |
| Glutamic                                   | 167.2 ± 59.1                          | 174.8 ± 56.3                     | 186.8 ± 75.7               | 207.8 ± 102.1      |
| Glutamine                                  | 467.1 <sup>a</sup> ± 97.6             | 476.2 <sup>a</sup> ± 100.6       | 506.3 <sup>a</sup> ± 124.8 | 575.2 ± 137.5      |
| Glycine                                    | 214.6 ± 37.3                          | 240.4 <sup>b</sup> ± 48.8        | 242.8 <sup>c</sup> ± 50.8  | 225.2 ± 38.9       |
| Proline                                    | 203.9 <sup>b,c</sup> ± 42.6           | 182.5 <sup>a</sup> ± 45.3        | 182.8 <sup>a</sup> ± 35.9  | 220.2 ± 46.7       |
| Serine                                     | 177.5 ± 37.9                          | 177.1 ± 44.8                     | 184.4 ± 55.7               | 189.4 ± 41.9       |
| Tyrosine                                   | 87.4 <sup>a,b</sup> ± 23.2            | 71.2 ± 19.1                      | 83.3 <sup>a,c</sup> ± 24.0 | 67.0 ± 14.0        |

\*SF, standard formula;  $\alpha$ -lac-EW, experimental formula with  $\alpha$ -lactalbumin-enriched whey ; CGMP-RW, experimental formula with reduced CGMP whey.

<sup>1</sup> Mean  $\pm$  SD. Groups compared by one-way ANOVA, post hoc Bonferroni.

P value < 0.05 are considered statistically significant and marked by superscript letters. <sup>a</sup>Significantly different vs. BF. <sup>b</sup> SF vs.  $\alpha$ -lac-EW. <sup>c</sup> SF vs. CGMP-RW.

<sup>d</sup>  $\alpha$ -lac-EW vs. CGMP-RW. \*\* Total mean of branched chain amino acids (BCAA), isoleucine, leucine and valine.

**Table S4.** Gastrointestinal symptoms in infants fed formula (SF,  $\alpha$ -lac-EW or CGMP-RW)\* or breast milk (BF) during the intervention, ITT population.

|                              | SF<br><i>n</i> = 70            | $\alpha$ -lac-EW<br><i>n</i> = 73 | CGMP-RW<br><i>n</i> = 69      | <i>P</i> -value <sup>1</sup> | BF<br><i>n</i> = 71 |
|------------------------------|--------------------------------|-----------------------------------|-------------------------------|------------------------------|---------------------|
| Stool frequency <sup>2</sup> | 1.3 $\pm$ 0.5 <sup>a,b,c</sup> | 1.1 $\pm$ 0.4 <sup>a</sup>        | 1.1 $\pm$ 0.4 <sup>a</sup>    | 0.001                        | 2.0 $\pm$ 1.1       |
| Watery stool <sup>3</sup>    | 1.0 (0;4)                      | 1.4 (0;6.6)                       | 0.6 (0;2.5)                   | 0.18                         | 0 (0;5.3)           |
| Loose stools <sup>3</sup>    | 50.4 (27.2;79.4) <sup>a</sup>  | 49.1 (22;80.7) <sup>a</sup>       | 38.4 (15.8;75.5) <sup>a</sup> | 0.26                         | 96.8 (80.2;100)     |
| Firm stools <sup>3</sup>     | 38.8 (8.7; 62.7) <sup>a</sup>  | 37 (7.2;73.3) <sup>a</sup>        | 45.8 (15.4;79.9) <sup>a</sup> | 0.24                         | 0 (0;7)             |
| Hard stools <sup>3</sup>     | 0.1 (0;4.5) <sup>a</sup>       | 0 (0;4.2) <sup>a</sup>            | 1.0 (0;6.4) <sup>a</sup>      | 0.35                         | 0 (0;0)             |
| Stomach pain <sup>4</sup>    | 1.6 (0;6.3)                    | 1.5 (0;8)                         | 0.8 (0;4.5)                   | 0.83                         | 1.5 (0;3.5)         |
| Vomiting <sup>5</sup>        | 2.2 (0;10) <sup>a</sup>        | 1.6 (0;11) <sup>a</sup>           | 1.4 (0;6.9)                   | 0.62                         | 0 (0;4.1)           |
| Flatulence <sup>6</sup>      | 5.0 (0.7;25.7)                 | 4.0 (0.6;16.6)                    | 3.7 (0.6;10)                  | 0.35                         | 4.6(0;13.7)         |

\*SF, standard formula;  $\alpha$ -lac-EW, experimental formula with  $\alpha$ -lactalbumin-enriched whey; CGMP-RW, experimental formula with reduced CGMP whey.

<sup>1</sup>Groups compared by one-way ANOVA, post hoc Bonferroni. Proportions compared by Kruskal-Wallis, post hoc Bonferroni. <sup>2</sup>Stools/day, mean  $\pm$  SD.

<sup>3</sup>Proportion of defecations from parental registration in diary, median (25th;75th percentiles). <sup>4</sup>Proportion of days with stomach pain, median (25th;75th percentiles). <sup>5</sup>Proportion of days with vomiting, median (25th;75th percentiles).

<sup>6</sup>Proportion of days with flatulence, median (25th;75th percentiles). <sup>a</sup>Significantly different vs. BR (*p*<0.05). <sup>b</sup>SF vs.  $\alpha$ -lac-EW. <sup>c</sup>SF vs. CGMP-RW.

**Table S5.** Estimated time to fall asleep, duration of crying and crying related to feeding as reported for 2 days/ week in infants fed formula (SF,  $\alpha$ -lac-EW or CGMP-RW)\* or breast milk (BF) during the intervention, ITT population.

|                                           | SF<br><i>n</i> =70 | $\alpha$ -lac-EW<br><i>n</i> =73 | CGMP-RW<br><i>n</i> =68 | <i>P</i> -value <sup>1</sup> | BF<br><i>n</i> =70 |
|-------------------------------------------|--------------------|----------------------------------|-------------------------|------------------------------|--------------------|
| Crying related to feeding <sup>2</sup>    | 1.25 (0;10.3)      | 0 (0;11.4)                       | 0 (0;9)                 | 0.77                         | 0 (0;11.8)         |
| Crying <1 h/d <sup>3</sup>                | 100 (93.0;100)     | 100 (94.4;100)                   | 97.4 (94;100)           | 0.83                         | 100 (95;100)       |
| Crying <30 min/d <sup>3</sup>             | 85 (66.4;98.0)     | 87 (68;100)                      | 86 (66.0;96.0)          | 0.65                         | 89 (64.2;100.0)    |
| Time to sleep < 5 min <sup>4</sup>        | 2.9 (0;32.7)       | 11 (0;40.0)                      | 9 (0;36.0)              | 0.49                         | 13.6 (0;34)        |
| Time to sleep 5 to < 15 min <sup>4</sup>  | 39.4 (16.4;64.8)   | 41 (21.8;61.8)                   | 50 (12.5;68.8)          | 0.71                         | 46 (21.1;62.9)     |
| Time to sleep 15 to < 30 min <sup>4</sup> | 23.7 (10.0;44.4)   | 15.8 (5.5;35.7)                  | 19.4 (2.9;35.2)         | 0.13                         | 16.7 (3.4;39.2)    |
| Time to sleep 30 to < 60 min <sup>4</sup> | 3.3 (0;13.3)       | 2.8 (0;8.6)                      | 0 (0;8.1)               | 0.27                         | 2.5 (0;13.3)       |
| Time to sleep > 60 min <sup>4</sup>       | 0 (0;2.6)          | 0 (0;2.7)                        | 0 (0;0)                 | 0.52                         | 0 (0;0)            |

\*SF, standard formula;  $\alpha$ -lac-EW, experimental formula with  $\alpha$ -lactalbumin-enriched whey; CGMP-RW, experimental formula with reduced CGMP whey.

<sup>1</sup>Proportions compared by Kruskal Wallis. <sup>2</sup>Proportion of days with crying during or after feeding, median (25th;75th percentiles). <sup>3</sup>Proportion of days with crying (25th;75th percentiles). <sup>4</sup>Proportion of days with time to fall asleep (25th;75th percentiles).
